# Supplementary material for: High-throughput computational screening of metal–organic frameworks with topological diversity for hexane isomer separations
Source: Royal Society of Chemistry journal article supplement (doi:10.1039/c8cp07527a), 2019-01-01
Supplement: c8cp07527a1.pdf [file c8cp07527a1.pdf]

## **Electronic Supplementary Information**

# **High-throughput Computational Screening of Metal Organic Frameworks with Topological Diversity for Hexane Isomer Separations**

**Liang Peng<sup>a</sup>, Qiao Zhu<sup>a</sup>, Pinglian Wu<sup>a</sup>, Xuanjun Wu<sup>a,\*</sup> and Weiquan Cai<sup>b,a,\*</sup>**

*<sup>a</sup>School of Chemistry, Chemical Engineering & Life Sciences, Wuhan University of Technology, Wuhan 430070, P.R. China; <sup>b</sup>School of Chemistry and Chemical Engineering, Guangzhou University, Guangzhou 510006, P.R. China.*

## **Table of Contents**

|                                                                                                      |            |
|------------------------------------------------------------------------------------------------------|------------|
| <b>Lennard-Jones parameters of MOFs .....</b>                                                        | <b>S2</b>  |
| <b>Potential parameters.....</b>                                                                     | <b>S3</b>  |
| <b>Models of nC6, 2MP, 3MP, 22DMB and 23DMB .....</b>                                                | <b>S4</b>  |
| <b>(a) NDMB-PLD, (b)SDMB-PLD, (c) NDMB-VSA, (d)SDMB-VSA relationships .....</b>                      | <b>S5</b>  |
| <b>Relationship plots between APS and density PLD .....</b>                                          | <b>S6</b>  |
| <b>Relationship plots between <math>N_{\text{DMB}}</math> and <math>Q_{\text{st}}^0</math> .....</b> | <b>S7</b>  |
| <b>Top MOFs .....</b>                                                                                | <b>S8</b>  |
| <b>Linkers of top MOFs.....</b>                                                                      | <b>S9</b>  |
| <b>Real MOFs performance parameters.....</b>                                                         | <b>S10</b> |
| <b>Comparison of MOFs performance.....</b>                                                           | <b>S11</b> |
| <b>Pore channels of top MOFs .....</b>                                                               | <b>S12</b> |
| <b>Parameters for breakthrough prediction .....</b>                                                  | <b>S13</b> |
| <b>Radial distribution function of 22DMB in MOF-163 .....</b>                                        | <b>S14</b> |
| <b>References .....</b>                                                                              | <b>S15</b> |

The interactions between framework atoms and hexane isomers were represented by Lennard-Jones (LJ) potential with no consideration of coulomb interaction (equation S1), and cross LJ parameters were estimated by the Lorentz-Berthelot combining rules. All potential parameters are listed in Table S1 and S2 according to UFF <sup>1</sup> and TraPPE <sup>2</sup> force field.

$$U_{ij} = 4\epsilon_{ij} \left[ \left( \frac{\sigma_{ij}}{r_{ij}} \right)^{12} - \left( \frac{\sigma_{ij}}{r_{ij}} \right)^6 \right] \quad (\text{S1})$$

where  $i$  and  $j$  are interacting atoms, and  $r_{ij}$  is the distance between atoms  $i$  and  $j$ .  $\epsilon_{ij}$  and  $\sigma_{ij}$  are LJ well depth and atomic pair equilibrium distance, respectively.

**Table S1.** Lennard-Jones parameters of MOFs.<sup>3</sup>

| Atom type | $\epsilon/k_B$ [K] | $\sigma$ [Å] | Atom type | $\epsilon/k_B$ [K] | $\sigma$ [Å] | Atom type | $\epsilon/k_B$ [K] | $\sigma$ [Å] |
|-----------|--------------------|--------------|-----------|--------------------|--------------|-----------|--------------------|--------------|
| C         | 47.86              | 3.47         | Zn        | 62.4               | 2.46         | Co        | 7.04               | 2.56         |
| H         | 7.65               | 2.85         | Zr        | 34.72              | 2.78         | Cr        | 7.55               | 2.69         |
| O         | 48.16              | 3.03         | Cu        | 2.516              | 3.11         | Mn        | 6.54               | 2.64         |
| N         | 38.95              | 3.26         | Si        | 155.99             | 3.81         | B         | 47.8               | 3.58         |

**Table S2a.** Bond bending potential, Bond stretch potential, Non-bonded Lennard-Jones parameters, Bond torsion potential of hexane isomers

$$U_{\text{bond-bending}} = \frac{1}{2} k_{\theta} (\theta - \theta_0)^2 \quad (\text{S2})$$

| bending                                             | $\theta_0$ | $k_{\theta}/k_B$ (K/rad <sup>2</sup> ) |
|-----------------------------------------------------|------------|----------------------------------------|
| CH <sub>x</sub> -(CH <sub>2</sub> )-CH <sub>y</sub> | 114        | 62500                                  |
| CH <sub>x</sub> -(CH)-CH <sub>y</sub>               | 112        | 62500                                  |
| CH <sub>x</sub> -(C)-CH <sub>y</sub>                | 109.47     | 62500                                  |

$$U_{bond-stretch} = \frac{1}{2} k_b (r - r_0)^2 \quad (\text{S3})$$

| stretch                          | $r_0$ [Å] | $k_b/k_B$ (K/rad <sup>2</sup> ) |
|----------------------------------|-----------|---------------------------------|
| CH <sub>x</sub> -CH <sub>x</sub> | 1.54      | 96500                           |

Non-bonded Lennard-Jones potentials are calculated by equation S1.

| LJ              | $\varepsilon/k_B$ [K] | $\sigma$ [Å] |
|-----------------|-----------------------|--------------|
| CH <sub>3</sub> | 108.0                 | 3.76         |
| CH <sub>2</sub> | 56.0                  | 3.96         |
| CH              | 17.0                  | 4.67         |
| C               | 0.8                   | 6.38         |

$$U_{bond-torsion} = c_0 + c_1 (1 + \cos \phi) + c_2 (1 - \cos 2\phi) + c_3 (1 + \cos 3\phi) \quad (\text{S4})$$

| torsion                                                                | $c_0/k_B$ [K/rad <sup>2</sup> ] | $c_1/k_B$ [K/rad <sup>2</sup> ] | $c_2/k_B$ [K/rad <sup>2</sup> ] | $c_3/k_B$ [K/rad <sup>2</sup> ] |
|------------------------------------------------------------------------|---------------------------------|---------------------------------|---------------------------------|---------------------------------|
| CH <sub>x</sub> -(CH <sub>2</sub> )-(CH <sub>2</sub> )-CH <sub>y</sub> | 0                               | 335.03                          | -68.19                          | 791.32                          |
| CH <sub>x</sub> -(CH <sub>2</sub> )-(CH)-CH <sub>y</sub>               | -251.06                         | 428.73                          | -111.85                         | 441.27                          |
| CH <sub>x</sub> -(CH <sub>2</sub> )-(C)-CH <sub>y</sub>                | 0                               | 0                               | 0                               | 461.29                          |
| CH <sub>x</sub> -(CH)-(CH)-CH <sub>y</sub>                             | -251.06                         | 428.73                          | -111.85                         | 441.27                          |
| CH <sub>x</sub> -(CH)-(C)-CH <sub>y</sub>                              | 0                               | 0                               | 0                               | 1635.7                          |

|                                                                                     |                                                                                    |
|-------------------------------------------------------------------------------------|------------------------------------------------------------------------------------|
| n-hexane (nC6)                                                                      | 2-methylpentane (2MP)                                                              |
| 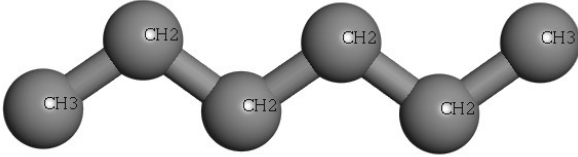   |  |
| 3-methylpentane (3MP)                                                               | 2,2-dimethylbutane (22DMB)                                                         |
|    |  |
| 2,3-dimethylbutane(23DMB)                                                           |                                                                                    |
|  |                                                                                    |

**Table S2b.** United-atom models of hexane isomers in TraPPE force field.

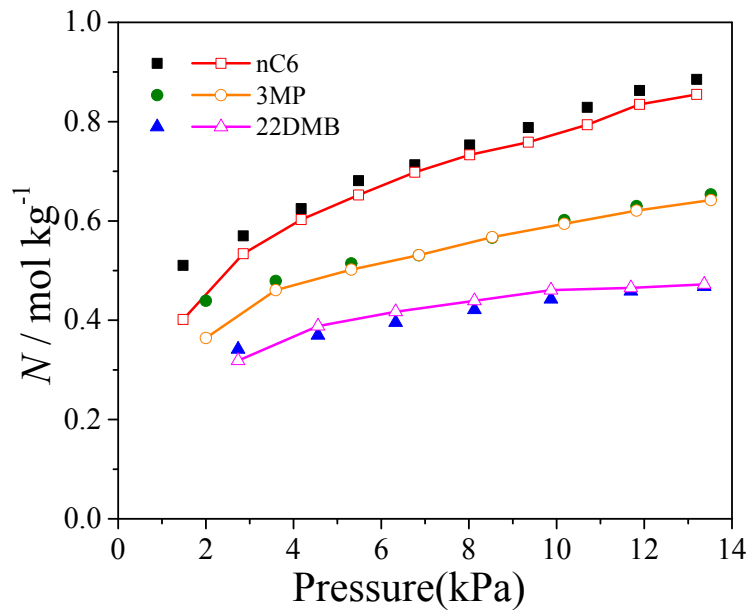

**Figure S2:** Comparison of simulated and experimental adsorption isotherms for nC6, 3MP and 22DMB in Fe-FDCA at 298 K. The solid and hollow points refer to the experimental and simulated data, respectively. The experimental data were taken from reference 4.

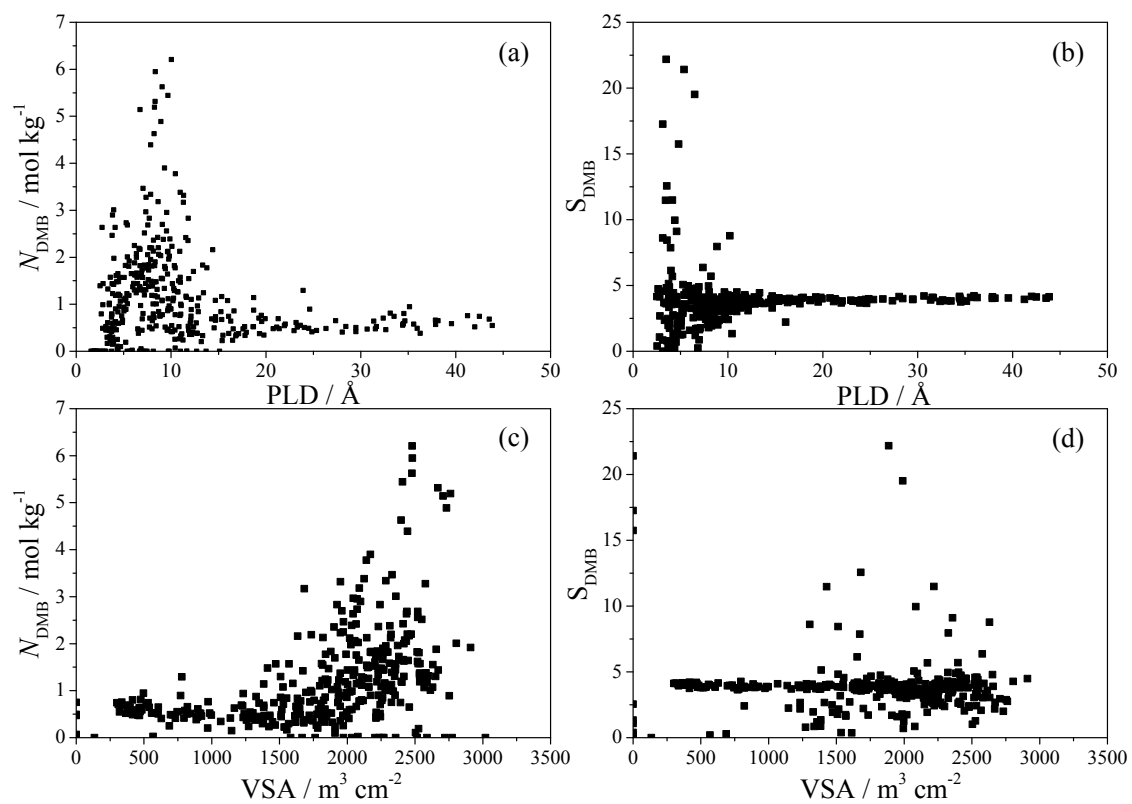

**Figure S3.** Relationship plots of (a)  $N_{\text{DMB}}$ ; (b)  $S_{\text{DMB}}$  versus PLD and (c)  $N_{\text{DMB}}$ ; (d)  $S_{\text{DMB}}$  versus VSA in 390 MOFs at 433 K.

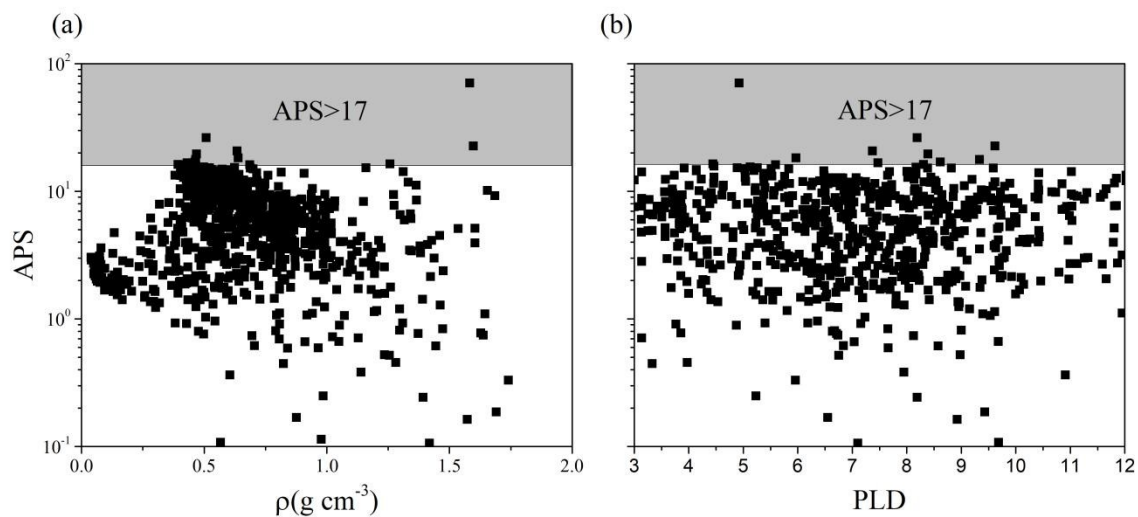

**Figure S4.** Relationship plots between APS<sup>5</sup> and (a) density; (b) PLD. The shadow region indicates APS > 17.

We explored the relationship plots of APS versus  $\rho$  and APS versus PLD for 841 MOFs at 10 bar and 433K. There are 8 MOFs with APS > 17 as seen from the shadow region in Figure S4. Neither APS versus  $\rho$  nor APS versus PLD shows a good correlation. However, PLD and  $\rho$  of the optimal MOFs are in the range of 4.5-10 Å and 0.5-1.7  $\text{g cm}^{-3}$ , respectively as shown in Figure S4.

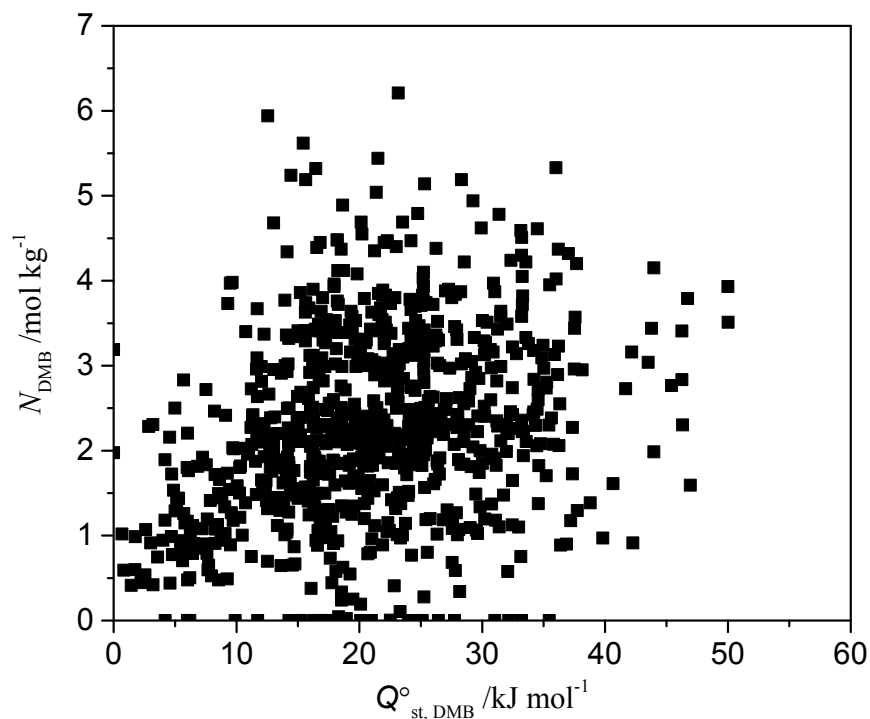

**Figure S5.** Relationship plots of adsorption capacity versus isosteric heat of adsorption ( $N_{\text{DMB}} \sim Q^{\circ}_{\text{st,DMB}}$ ) for 22DMB and 23DMB in MOFs.

Figure S5 shows the relationship plots of  $N_{\text{DMB}}$  versus  $Q^{\circ}_{\text{st,DMB}}$  for 22DMB and 23DMB in each MOF.  $N_{\text{DMB}}$  refers to the sum of the adsorption capacities for 22DMB and 23DMB in each MOF, while  $Q^{\circ}_{\text{st,DMB}}$  is the geometric average of the isosteric heat of adsorption for 22DMB and 23DMB in each MOF.  $N_{\text{DMB}}$  versus  $Q^{\circ}_{\text{st,DMB}}$  do not show a good correlation, but the MOFs with the optimal adsorption capacity have  $Q^{\circ}_{\text{st,DMB}}$  in the range of 15-40  $\text{kJ mol}^{-1}$  as shown in Figure S5.



**Table S3.** Top 22 MOFs with high APS and their physical properties

| No. | MOFs     | Topology    | Linker | APS   | $N_{\text{DMB}}$<br>mol kg <sup>-1</sup> | $S_{\text{DMB}}$ | PLD<br>Å | LCD<br>Å | VSA<br>m <sup>2</sup> cm <sup>-3</sup> | $\rho$<br>g cm <sup>-3</sup> | $Q_{\text{st}}^{\circ}$<br>kJ mol <sup>-1</sup> |
|-----|----------|-------------|--------|-------|------------------------------------------|------------------|----------|----------|----------------------------------------|------------------------------|-------------------------------------------------|
| 1   | MOF-163  | <b>bct</b>  | L_2    | 70.59 | 1.98                                     | 35.56            | 3.97     | 6.85     | 2047.25                                | 1.58                         | 43.62                                           |
| 2   | MOF-213  | <b>bcu</b>  | L_32   | 26.28 | 4.62                                     | 5.69             | 8.21     | 9.79     | 2397.44                                | 0.51                         | 29.10                                           |
| 3   | MOF-304  | <b>bcu</b>  | L_2    | 22.69 | 1.021                                    | 22.21            | 3.49     | 6.60     | 2006.56                                | 1.59                         | 35.98                                           |
| 4   | MOF-22   | <b>acs</b>  | L_2    | 20.74 | 3.27                                     | 6.34             | 7.37     | 7.98     | 2577.5                                 | 0.63                         | 29.38                                           |
| 5   | MOF-3549 | <b>gar</b>  | L_20   | 19.63 | 5.19                                     | 3.78             | 6.75     | 9.89     | 2458.92                                | 0.46                         | 28.48                                           |
| 6   | MOF-4030 | <b>ith</b>  | L_24   | 18.34 | 3.79                                     | 4.83             | 5.32     | 7.85     | 2361.05                                | 0.63                         | 47.20                                           |
| 7   | MOF-3639 | <b>gar</b>  | L_15   | 17.73 | 5.33                                     | 3.32             | 7.11     | 9.93     | 2369.57                                | 0.46                         | 36.03                                           |
| 8   | MOF-4522 | <b>lcsb</b> | L_5    | 17.01 | 4.79                                     | 3.55             | 7.47     | 10.01    | 2376.04                                | 0.46                         | 23.89                                           |
| 9   | MOF-4521 | <b>lcsb</b> | L_4    | 16.73 | 4.69                                     | 3.56             | 8.11     | 10.80    | 2260.71                                | 0.43                         | 20.07                                           |
| 10  | MOF-144  | <b>bct</b>  | L_12   | 16.37 | 1.64                                     | 9.93             | 4.41     | 7.50     | 2086.83                                | 1.25                         | 31.96                                           |
| 11  | MOF-3640 | <b>gar</b>  | L_16   | 16.19 | 5.04                                     | 3.21             | 9.33     | 10.79    | 2409.78                                | 0.39                         | 21.27                                           |
| 12  | MOF-4076 | <b>ith</b>  | L_25   | 16.17 | 3.41                                     | 4.74             | 5.67     | 8.41     | 2326.83                                | 0.68                         | 46.42                                           |
| 13  | MOF-3361 | <b>ftw</b>  | L_24   | 15.52 | 4.08                                     | 3.81             | 7.93     | 16.03    | 2227.82                                | 0.49                         | 18.73                                           |
| 14  | MOF-4335 | <b>lcsb</b> | L_4    | 15.44 | 4.55                                     | 3.39             | 8.13     | 11.45    | 2249.98                                | 0.43                         | 20.60                                           |
| 15  | MOF-4161 | <b>ith</b>  | L_15   | 15.35 | 3.51                                     | 4.37             | 5.59     | 8.01     | 2220.34                                | 0.62                         | 50.12                                           |
| 16  | MOF-4094 | <b>ith</b>  | L_41   | 15.32 | 4.47                                     | 3.42             | 8.09     | 10.61    | 2322.85                                | 0.43                         | 21.87                                           |
| 17  | MOF-8583 | <b>rht</b>  | L_15   | 15.29 | 3.72                                     | 4.11             | 7.28     | 16.02    | 2219.92                                | 0.52                         | 17.26                                           |
| 18  | MOF-2360 | <b>fcu</b>  | L_14   | 15.29 | 1.741                                    | 8.78             | 4.83     | 8.43     | 2254.99                                | 1.15                         | 28.04                                           |
| 19  | MOF-4043 | <b>ith</b>  | L_38   | 15.25 | 3.96                                     | 3.85             | 7.24     | 12.13    | 2259.83                                | 0.43                         | 17.33                                           |
| 20  | MOF-4162 | <b>ith</b>  | L_16   | 15.25 | 3.97                                     | 3.84             | 6.36     | 8.62     | 2361.39                                | 0.51                         | 31.99                                           |
| 21  | MOF-117  | <b>bcs</b>  | L_30   | 15.23 | 5.14                                     | 2.96             | 6.73     | 9.02     | 2707.87                                | 0.51                         | 25.30                                           |
| 22  | MOF-5923 | <b>ocu</b>  | L_12   | 15.19 | 3.29                                     | 4.61             | 6.54     | 14.90    | 2366.18                                | 0.68                         | 26.32                                           |

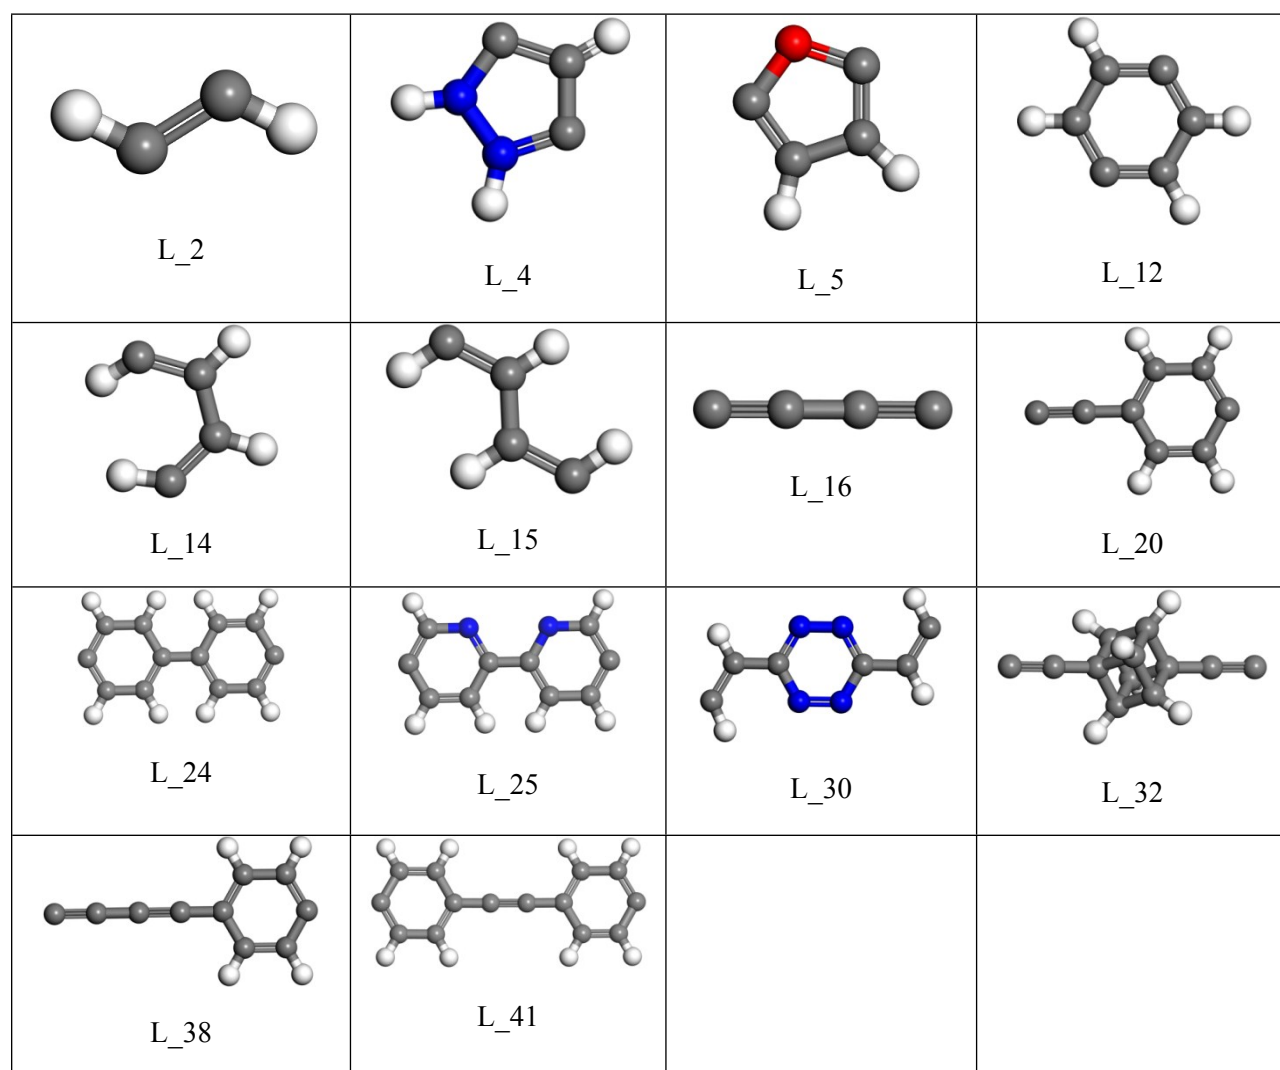

**Figure S6.** Linkers of top-performance MOFs.<sup>6</sup>

**Table S4.** Comparison of MOF-163 and real MOFs in terms of adsorption capacities ( $N$ ) of hexane isomers and selectivities<sup>7-12</sup>

| Adsorbents                    | condition     | $N$ (nC6)<br>mol kg <sup>-1</sup> | $N$ (2MP)<br>mol kg <sup>-1</sup> | $N$ (3MP)<br>mol kg <sup>-1</sup> | $N$ (22DMB)<br>mol kg <sup>-1</sup> | $N$ (23DMB)<br>mol kg <sup>-1</sup> | $S_{\text{DMB}}$   | ref       |
|-------------------------------|---------------|-----------------------------------|-----------------------------------|-----------------------------------|-------------------------------------|-------------------------------------|--------------------|-----------|
| ZIF-8                         | 423K, 50kPa   | 0.85                              | 0.25                              | 0.15                              | 0.014                               | 0.038                               | 16.03 <sup>a</sup> | 7         |
| AC16                          | 303K, 30kPa   | 1.45                              | -                                 | 0.42                              | 0.09                                | 0.21                                | 6.23 <sup>a</sup>  | 8         |
| XG00-4.5                      | 298K, 10.5kPa | 3.01                              | -                                 | 1.15                              | 0.95                                | -                                   | 2.19 <sup>a</sup>  | 9         |
| Zr-bptc                       | 423K, 12kPa   | 1.43                              | -                                 | 0.248                             | 0.10                                | -                                   | 8.39 <sup>a</sup>  | 10        |
| Zr-abtc                       | 423K, 12kPa   | 1.204                             | -                                 | 1.02                              | 0.488                               | -                                   | 2.27 <sup>a</sup>  | 10        |
| Zn(BDC)(Dabco) <sub>0.5</sub> | 313K, 33.4kPa | 0.657                             | -                                 | 0.188                             | 0.116                               | -                                   | 3.61 <sup>a</sup>  | 11        |
| UIO-66_3a                     | 423K, 0.6 kPa | 0.034                             | -                                 | 0.119                             | 0.227                               | 0.223                               | 2.94               | 12        |
| UIO-66_4b                     | 473K, 6.3 kPa | 0.093                             | -                                 | 0.19                              | 0.28                                | 0.272                               | 1.95               | 12        |
| MOF-163_1                     | 433K, 100kPa  | 0.0059                            | -                                 | 0.0711                            | 1.1384                              | -                                   | 29.57              | this work |
| MOF-163_2                     | 433K, 100kPa  | 0.0014                            | 0.018                             | 0.043                             | 0.723                               | 0.213                               | 22.5               | this work |

<sup>a</sup> The part of experimental data refer to the reverse selectivity of  $S_{\text{DMB}}$ .

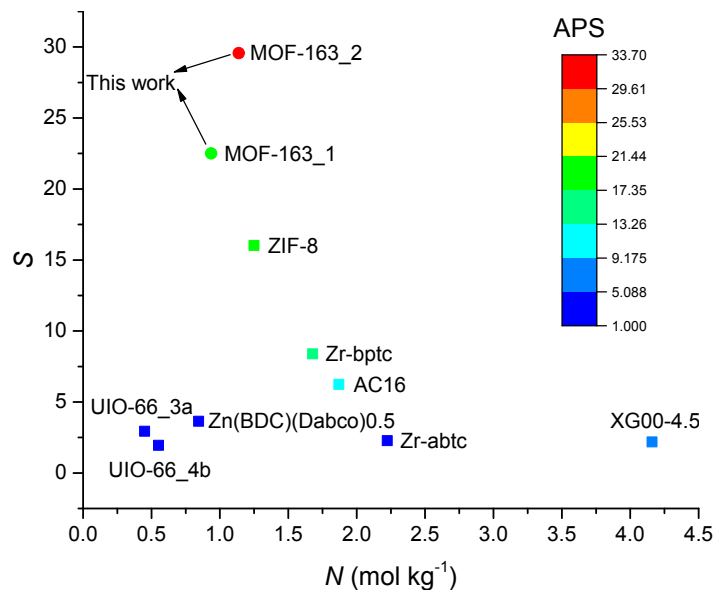

**Figure S7.** Relationship plots of adsorption selectivity versus total capacity of preferred adsorption components for separation of a multicomponent equimolar mixture (nC6/2MP/3MP/22DMB/23DMB) in various porous materials. The solid circles refer to the simulated data in this work while the solid rectangles refer to the experimental data.<sup>7-12</sup>The experimental data refer to the selectivity for nC6/22DMB except ones of UIO-66 while the data of UIO and MOF-163 refer to the selectivity for 22DMB/nC6. APS of porous materials except UIO and MOF-163 was newly defined as  $APS = N_{(nC6+2MP+3MP)} / S_{DMB}$ . Total capacity of preferred adsorption components in UIO and MOF-163 refers to  $N_{(22DMB+23DMB)}$  while that in the other materials refers to  $N_{(nC6+2MP+3MP)}$ .

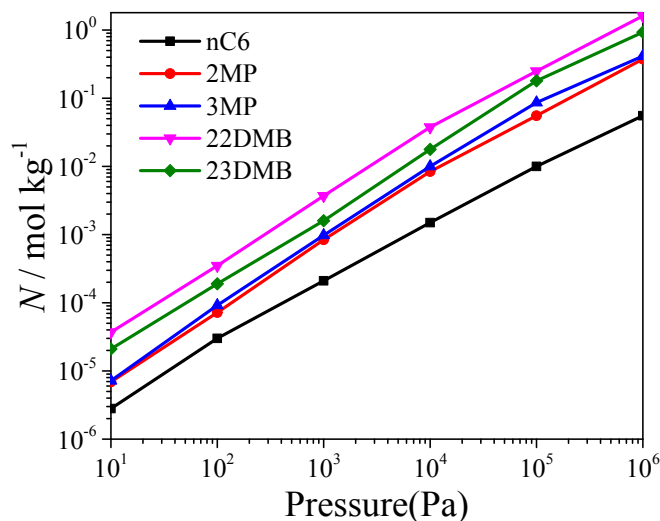

**Figure S8.** Adsorption isotherms of each component (nC6, 2MP, 3MP, 22DMB and 23DMB) for a quinary equimolar mixture in MOF-9355 (*a.k.a.* she-MOF-1) at 433 K.

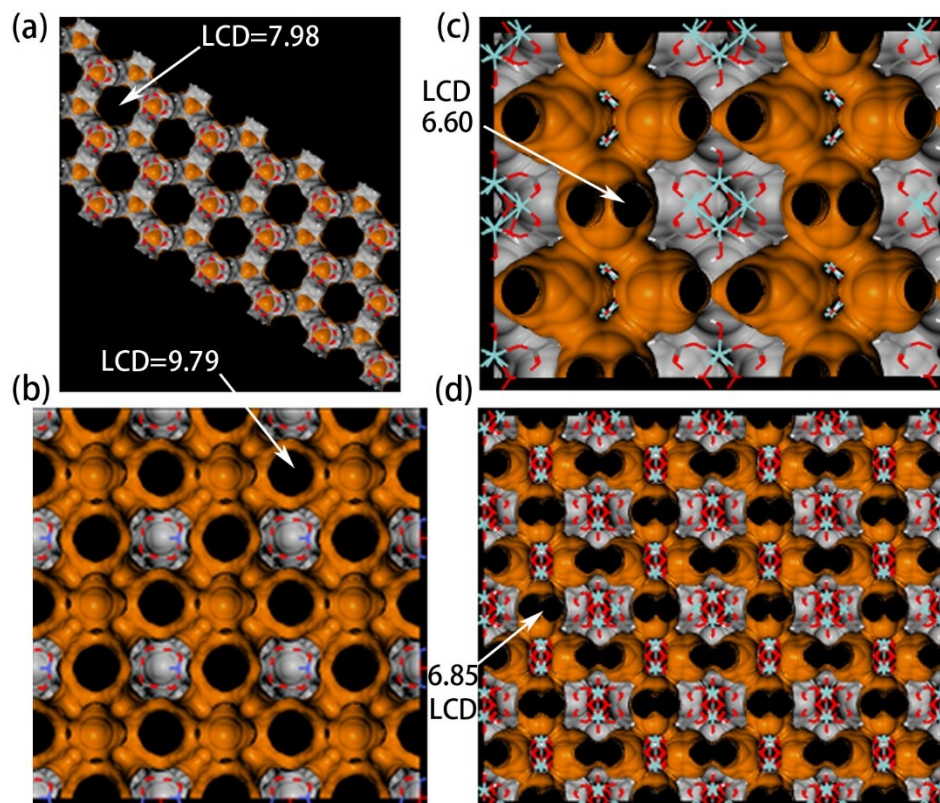

**Figure S9.** Structures and pore channels of top-performance MOFs.

(a) MOF-22; (b) MOF-213; (c) MOF-304; (d) MOF-163.

**Table S5.** Parameters used for breakthrough prediction<sup>13</sup>

| Parameter                    | Value                  |
|------------------------------|------------------------|
| Length( $L$ )                | 0.3m                   |
| Inlet Velocity ( $v_0$ )     | 0.04 m/s               |
| Void Fraction ( $\epsilon$ ) | 0.4                    |
| Crystal Density ( $\rho$ )   | 1.58 g/cm <sup>3</sup> |
| Bed Pressure ( $P_0$ )       | 1 bar                  |
| Column Temperature ( $T_0$ ) | 433 K                  |

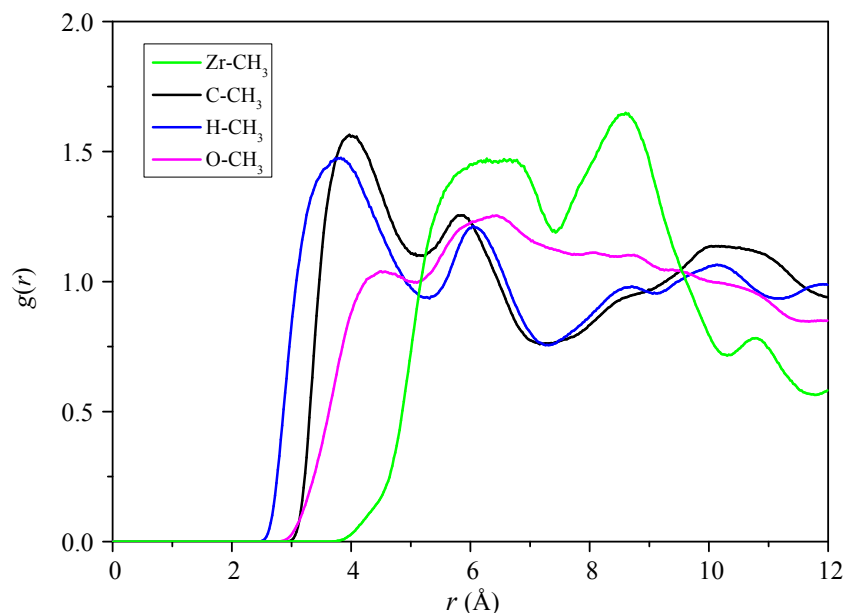

**Figure S10.** Radial distribution functions of various atom pairs between adsorbed 22DMB ( $\text{CH}_3$  refers to the methyl group of 22DMB) and the framework atoms (including Zr, C H and O) in MOF-163 at 433 K and 10 bar.

## References

- (1) Rappé, A. K.; Casewit, C. J.; Colwell, K. S.; Goddard, W. A.; Skiff, W. M. UFF, a Full Periodic Table Force Field for Molecular Mechanics and Molecular Dynamics Simulations. *J. Am. Chem. Soc.* **1992**, *114*, 10024-10035.
- (2) Martin, M. G.; Siepmann, J. I. Transferable Potentials for Phase Equilibria. 1. United-Atom Description of N-Alkanes. *J. Phys. Chem. B.* **1998**, *102*, 2569-2577.
- (3) Dubbeldam, D.; Krishna, R.; Calero, S. Computer-assisted screening of ordered crystalline nanoporous adsorbents for separation of alkane isomers. *Angew. Chem. Int. Edit.* **2012**, *51*, 11867-11871.
- (4) Lv, D.; Wang, H.; Chen, Y.; et al. An Iron Based Metal-Organic Framework with Hydrophobic Quadrilateral Channels for Highly Selective Separation of Hexane Isomers. *ACS Appl. Mater. Inter.* **2018**, *10*, 6031-6038.
- (5) Altintas, C.; Erucar, I.; Keskin, S. High-Throughput Computational Screening of the Metal Organic Framework Database for  $\text{CH}_4/\text{H}_2$  Separations. *ACS Appl. Mater. Inter.* **2018**, *10*, 3668-3679.
- (6) Gómez-Gualdrón, D. A.; Colón, Y. J.; Zhang, X., et al. Evaluating topologically diverse metal-organic frameworks for cryo-adsorbed hydrogen storage. *Energ. Environ. Sci.* **2016**, *9*, 3279-3289.
- (7) Henrique, A.; Rodrigues, A. E.; Silva, J. A. C. Separation of Hexane Isomers in ZIF-8 by Fixed Bed Adsorption. *Ind. Eng. Chem. Res.* **2019**, *58*, 378-394.

- (8) Vivo-Vilches, J. F.; Pérez-Cadenas, A. F.; Maldonado-Hódar, F. J., et al. From Carbon Molecular Sieves to VOCs filters: Carbon gels with tailored porosity for hexane isomers adsorption and separation. *Micropor. Mesopor. Mat.* **2018**, *270*, 161-167.
- (9) Fernandes, J.; Fernandes, A. C.; Echeverria, J. C., et al. Adsorption of gases and vapours in silica based xerogels. *Colloids Surf. A.* **2019**, *561*, 128-135.
- (10) Wang, H.; Dong, X.; Lin, J., et al. Topologically guided tuning of Zr-MOF pore structures for highly selective separation of C6 alkane isomers. *Nat. Commun.* **2018**, *9*(1), 1745.
- (11) Bárcia, P. S.; Zapata, F.; Silva, J. A. C., et al. Kinetic Separation of Hexane Isomers by Fixed-Bed Adsorption with a Microporous Metal-Organic Framework. *J. Phys. Chem. B.* **2007**, *111*, 6101-6103.
- (12) Patrick, S. Bárcia.; GuimarãEs, D.; Patrícia, A. P. Mendes., et al. Reverse shape selectivity in the adsorption of hexane and xylene isomers in MOF UiO-66. *Microporous and Mesoporous Materials*, **2011**, *139*, 67-73.
- (13) Krishna, R.; Long, J. R. Screening Metal-Organic Frameworks by Analysis of Transient Breakthrough of Gas Mixtures in a Fixed Bed Adsorber. *J. Phys. Chem. C.* **2011**, *115*, 12941-12950.
